# Supplementary material
Source: PubMed Central journal article supplement (PMC4649157)
Supplement: AAC.01890-15_zac012154633so1.pdf [file AAC.01890-15_zac012154633so1.pdf]

**Supplementary table S1:** Gene annotations as described by Homann *et al.*, 2009.

| Target        | ORF     | Gene         | Annotation                                                                                                                                                                                                                                              |
|---------------|---------|--------------|---------------------------------------------------------------------------------------------------------------------------------------------------------------------------------------------------------------------------------------------------------|
|               | 193188  | <i>TAC1</i>  | Transcriptional activator of drug-responsive genes including CDR1 and CDR2; has Zn(2)-Cys(6) binuclear cluster; binds DRE element; gene in zinc cluster region near MTL locus; resequencing indicates that TAC1 spans orf19.3188 and orf19.3189         |
|               | 19.4438 | <i>RME1</i>  | Protein similar to <i>S. cerevisiae</i> meiotic regulator Rme1p; white-specific transcription; upregulation correlates with clinical development of fluconazole resistance; transcription is not regulated during rat oral infection                    |
|               | 19.7359 | <i>CRZ1</i>  | Putative transcription factor; similar to <i>S. cerevisiae</i> calcineurin-regulated transcription factor Crz1p; mutant is fluconazole hypersensitive; likely to act downstream of calcineurin; has C2H2 zinc fingers; not required for mouse virulence |
| Drug-response | 19.7372 | <i>MRR1</i>  | Regulator of MDR1 transcription; zinc-finger protein; gain-of-function mutations cause upregulation of MDR1 (which encodes plasma membrane multidrug efflux pump) and consequent multidrug resistance                                                   |
|               | 19.2119 | <i>NDT80</i> | Activator of CDR1 induction by antifungal drugs; required for wild-type drug resistance; transcriptionally induced upon antifungal drug treatment; similar to <i>S. cerevisiae</i> Ndt80p, which is a meiosis-specific transcriptional regulator        |
|               | 19.6817 | <i>FCR1</i>  | Putative zinc cluster transcription factor; negative regulator of fluconazole, ketoconazole, brefeldin A resistance; transposon mutation affects filamentous growth; partially suppresses <i>S. cerevisiae</i> pdr1 pdr3 mutant fluconazole sensitivity |
|               | 19.1623 | <i>CAP1</i>  | Transcription factor, AP-1 family; role in oxidative stress response and resistance, multidrug resistance; oxidative stress regulates nuclear localization; partially complements <i>S. cerevisiae</i> yap1 mutation; human neutrophil-induced          |
